# Supplementary material for: GPR39 localization in the aging human brain and correlation of expression and polymorphism with vascular cognitive impairment
Source: PubMed Central journal article supplement — Alzheimers Dement (N Y). 2021 Oct 14;7(1):e12214. doi: 10.1002/trc2.12214 (PMC8515554; doi:10.1002/trc2.12214), 2021-10-14
Supplement: TRC2-7-e12214-s001.pdf [file TRC2-7-e12214-s001.pdf]

Young Adult

Aged Control

Aged VCI

Grey  
Matter

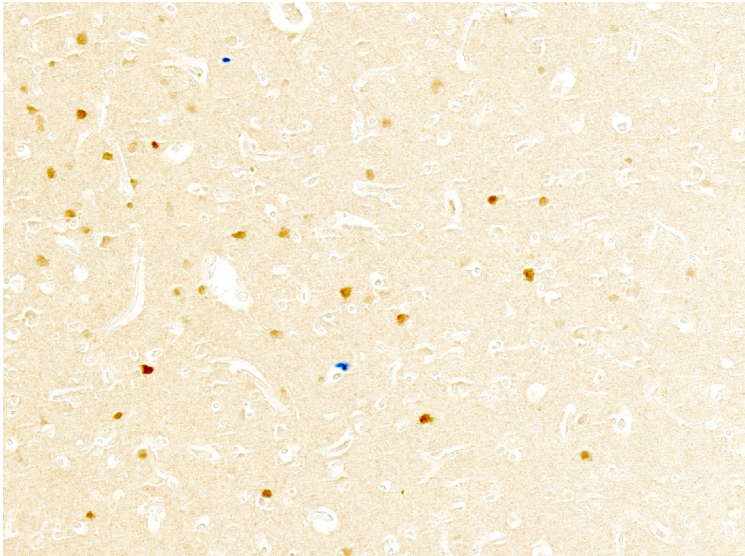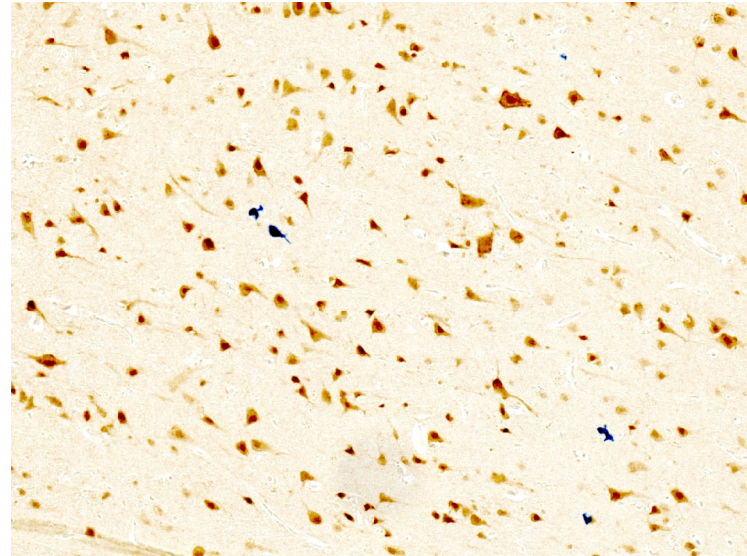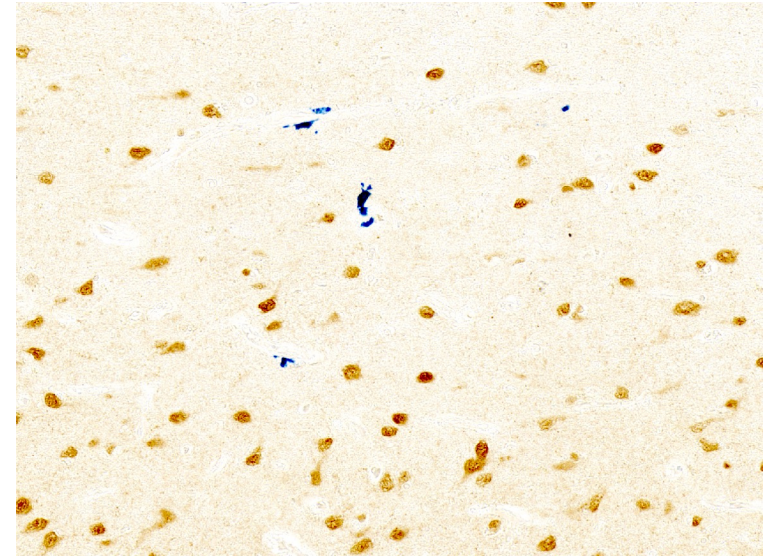

White  
Matter

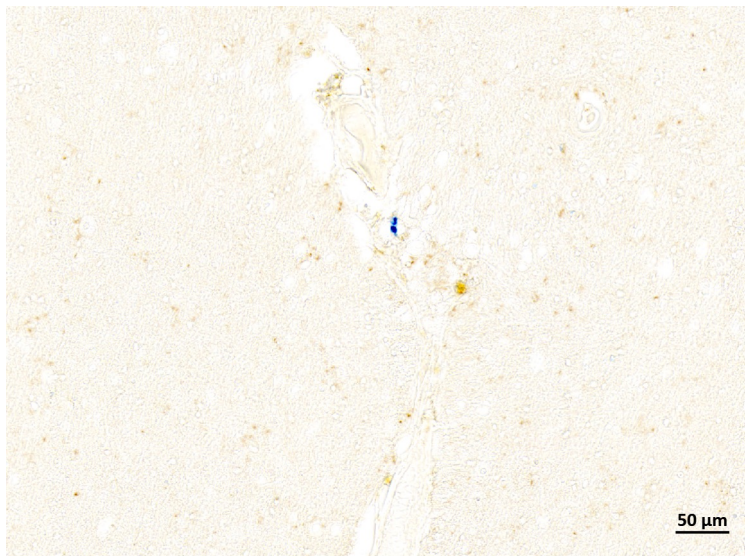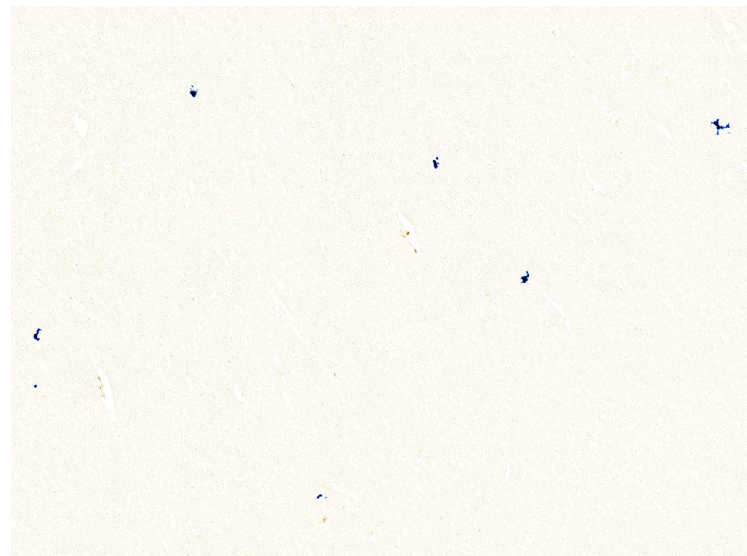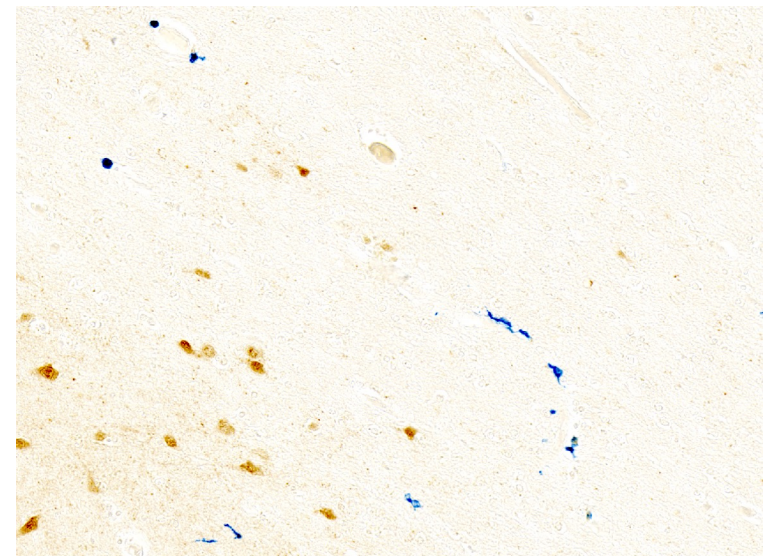

**Figure S2: Double-labelling of GPR39 and neurons.**

Representative images of NeuN (brown) and GPR39 (blue) in human dlPFC grey and white matter.
