# Supplementary material for: GPR39 localization in the aging human brain and correlation of expression and polymorphism with vascular cognitive impairment
Source: PubMed Central journal article supplement — Alzheimers Dement (N Y). 2021 Oct 14;7(1):e12214. doi: 10.1002/trc2.12214 (PMC8515554; doi:10.1002/trc2.12214), 2021-10-14

**Figure S1: Microglial colocalization of GPR39 in aged brain.** Quantification of colocalization of GPR39 with CD68, in both grey and white matter of aged control and VCI human brains. Data represent mean  $\pm$  SEM (n=13-15/group). Representative images shown in Figure 3.

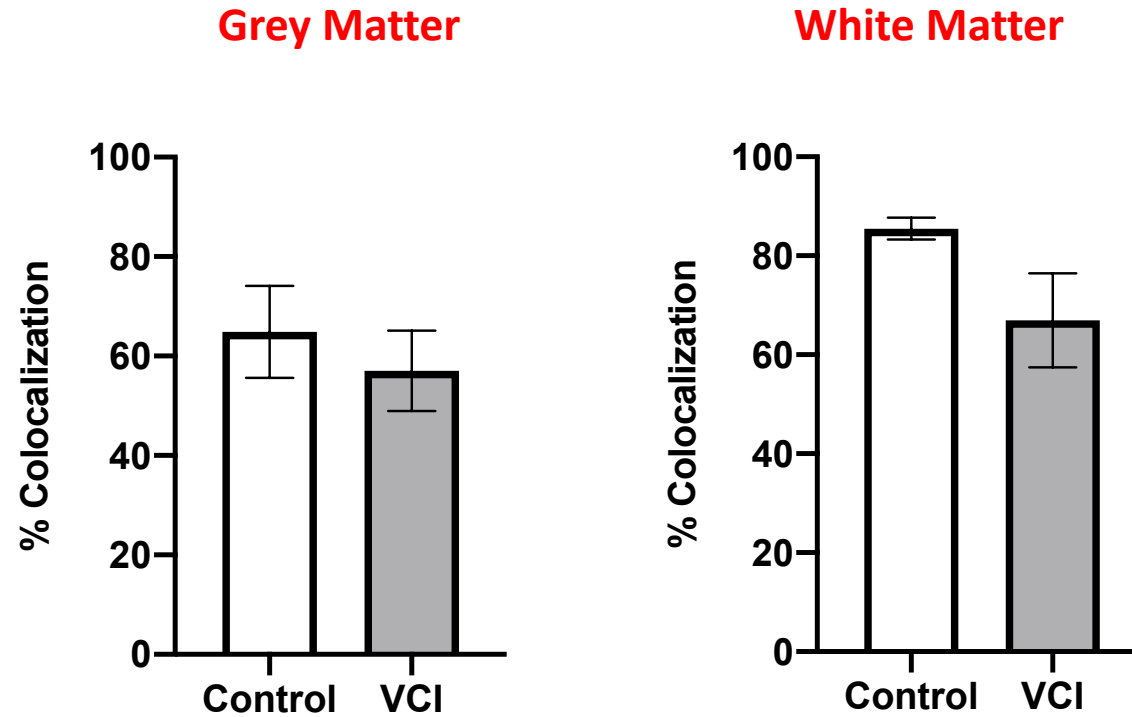

Supplement: TRC2-7-e12214-s002.pdf [file TRC2-7-e12214-s002.pdf]
